# Supplementary material
Source: HighWire-hosted journal article supplement (http://d2538ggaoe6cji.cloudfront.net/highwire/filestream/51106/field_highwire_adjunct_files/0/136564-1.pdf)
Supplement: 136564-1.pdf [file 136564-1.pdf]

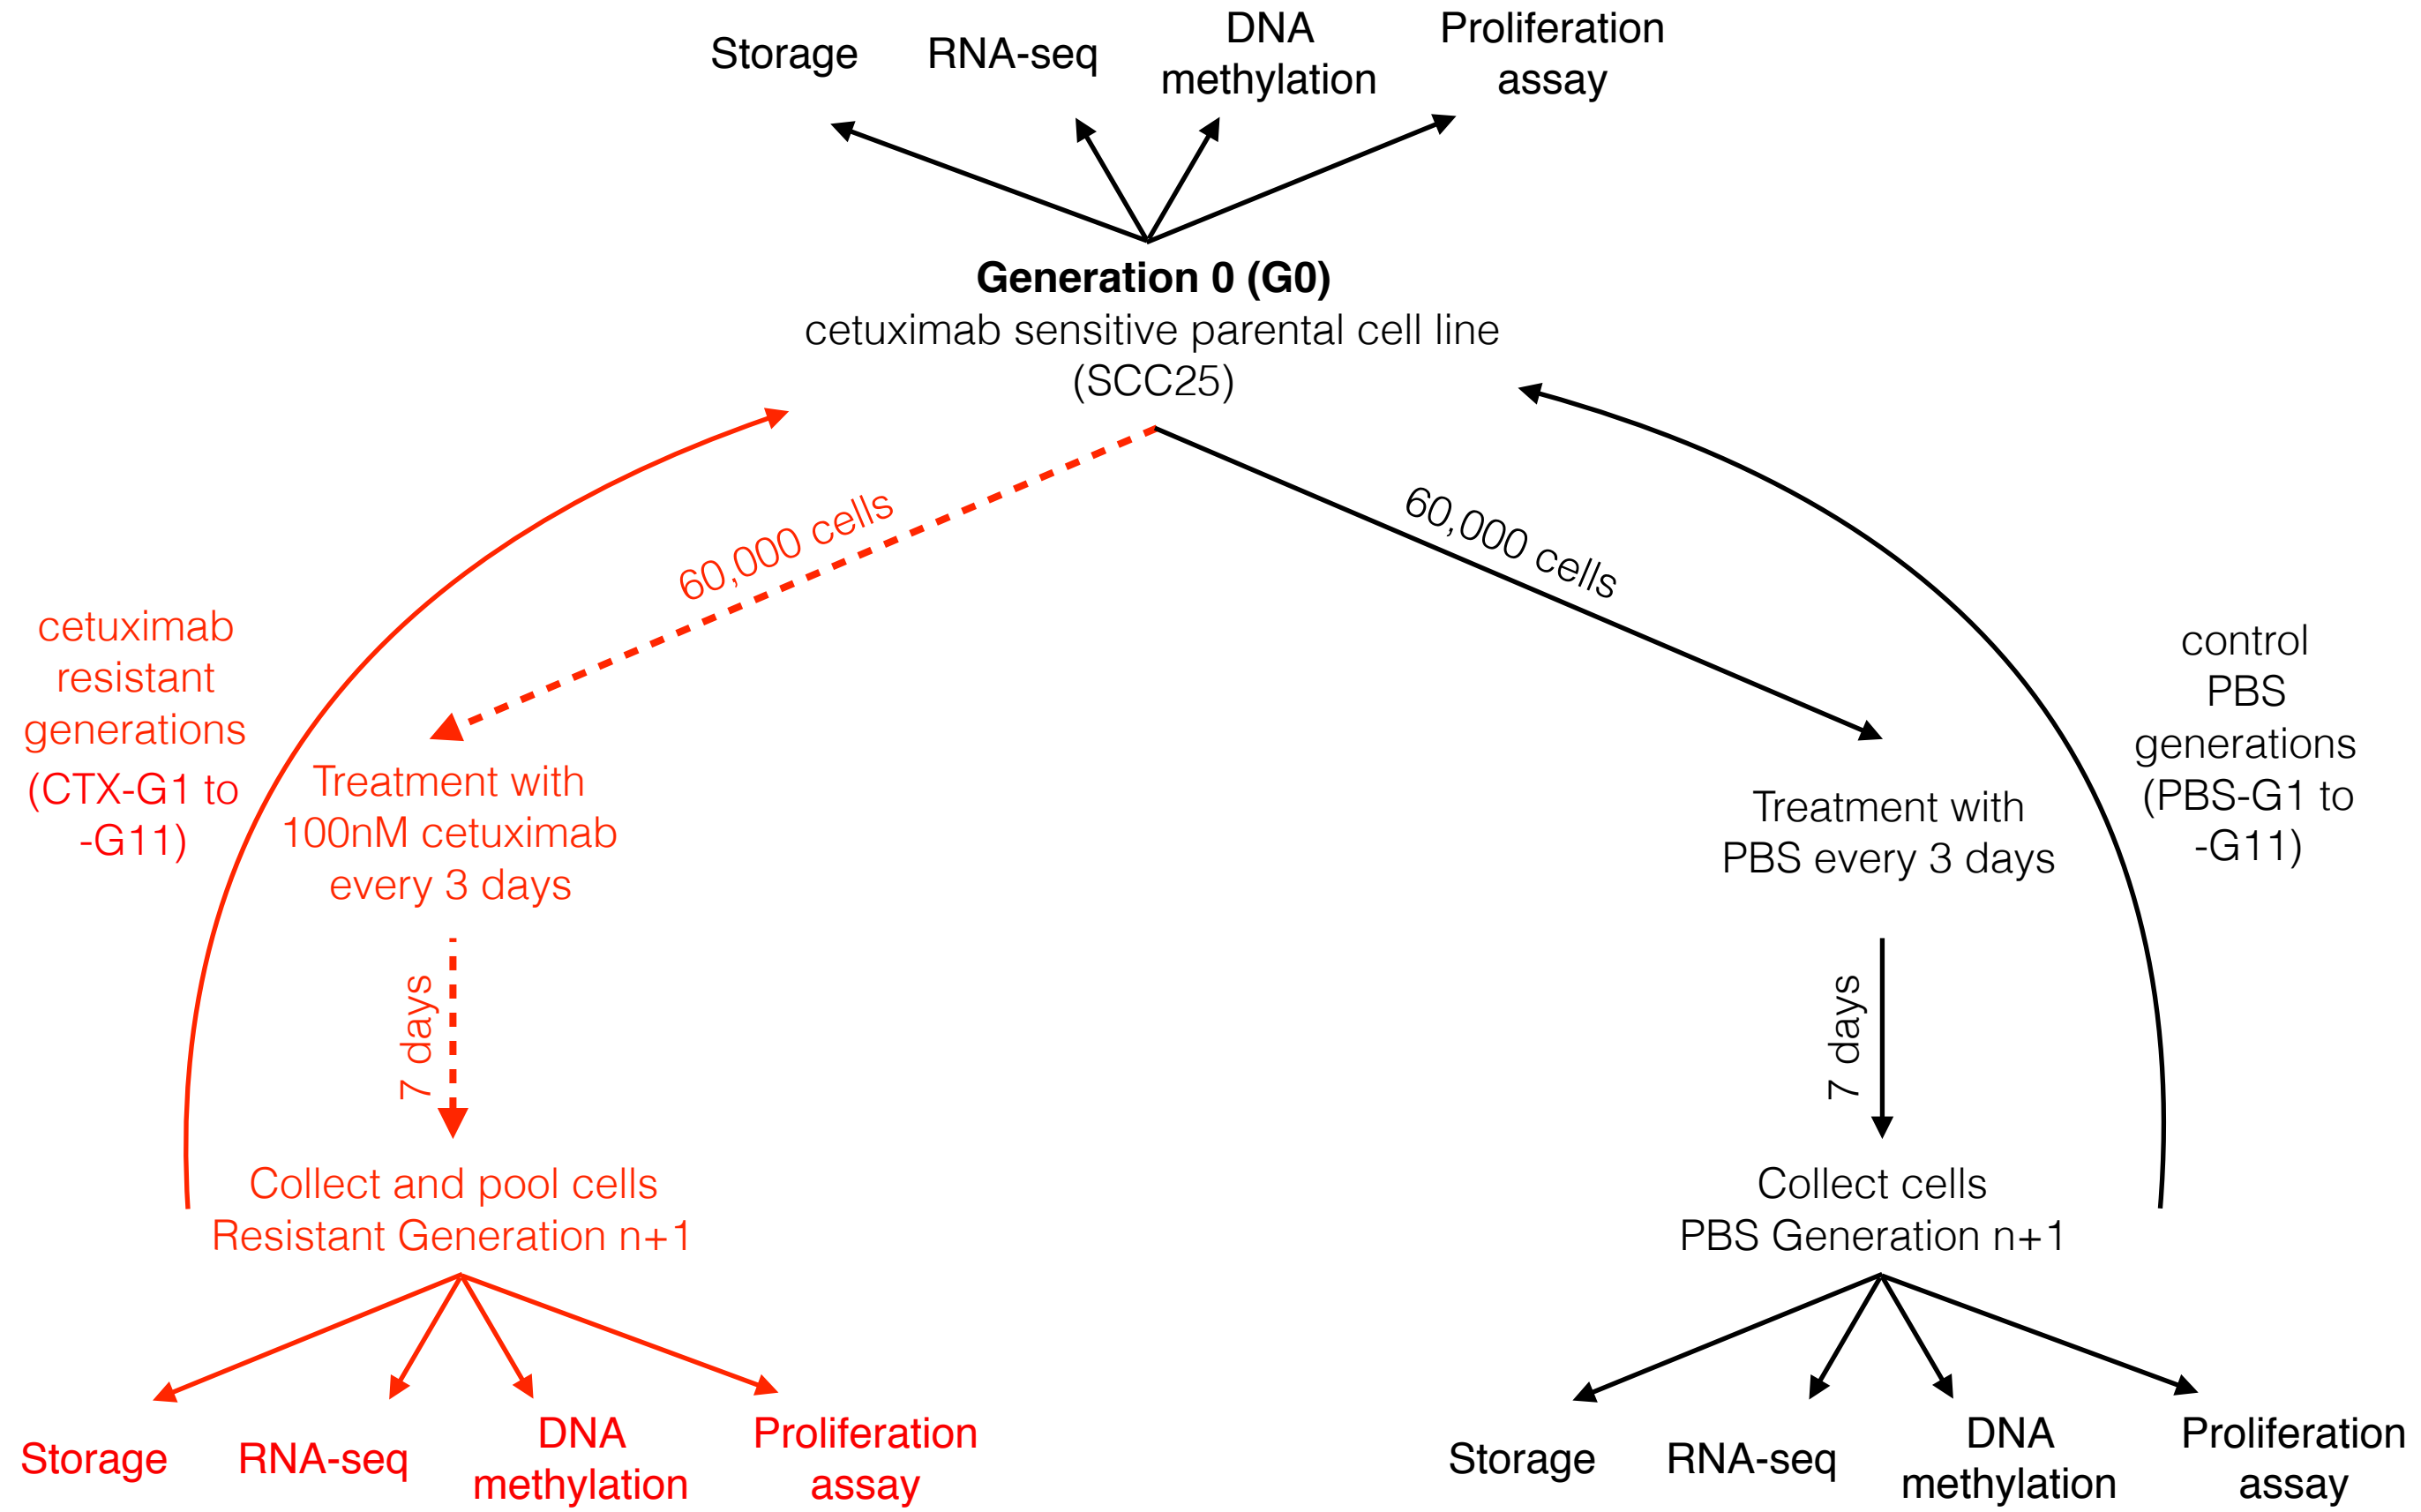

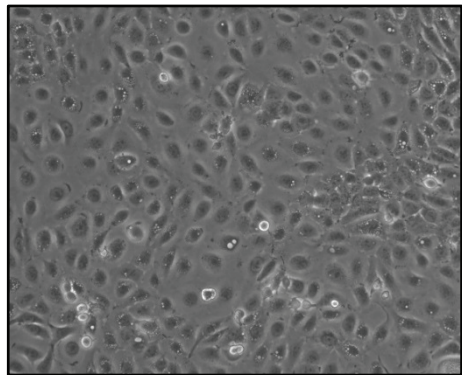

SCC25

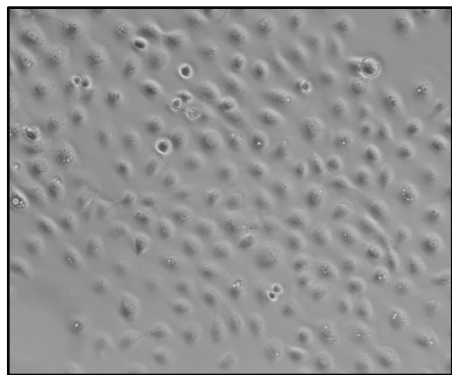

CTXR1

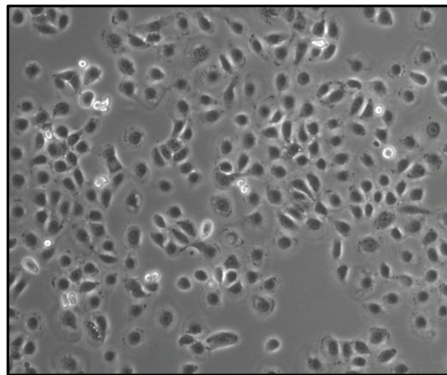

CTXR2

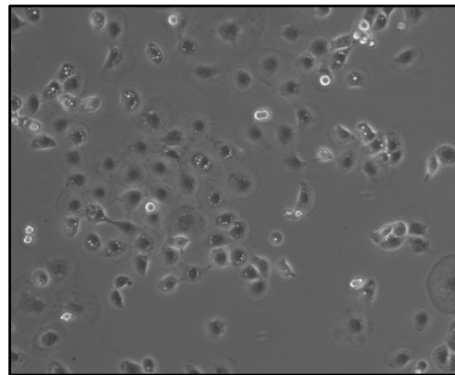

CTXR3

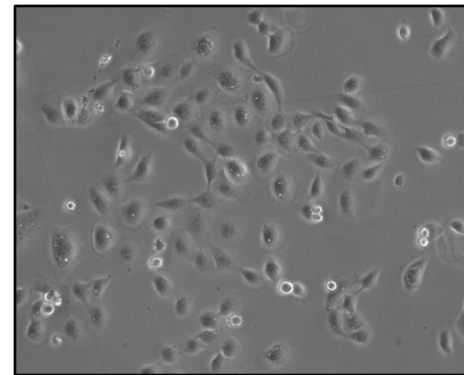

CTXR4

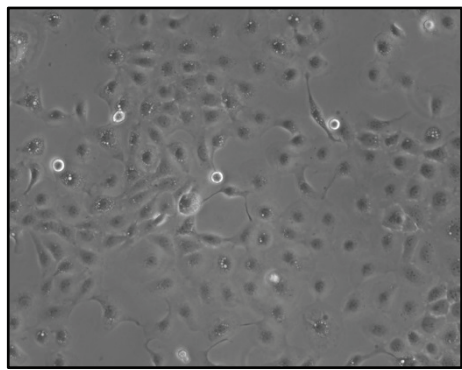

CTXR5

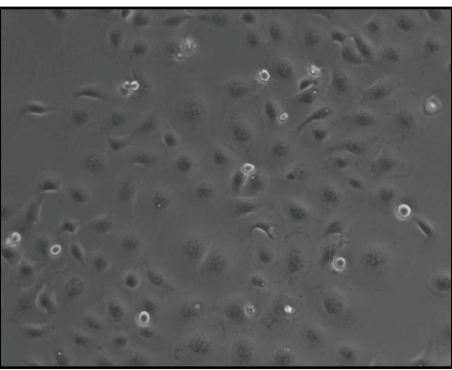

CTXR6

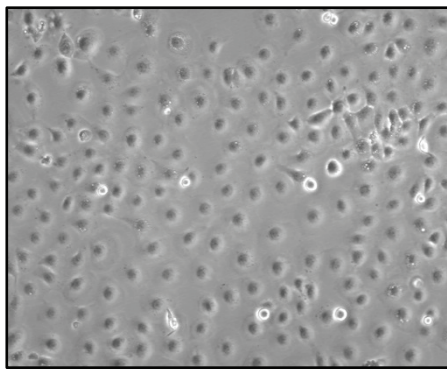

CTXR7

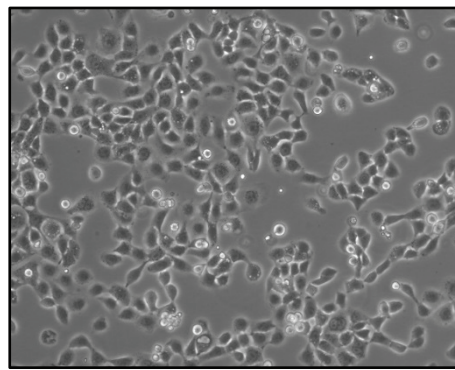

CTXR8

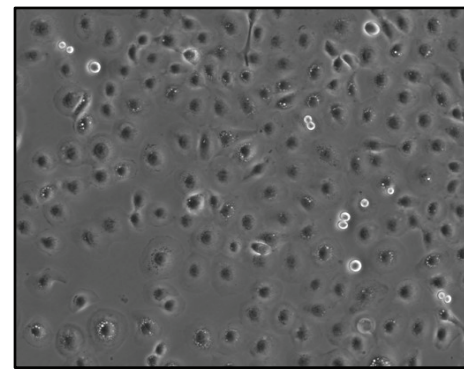

CTXR9

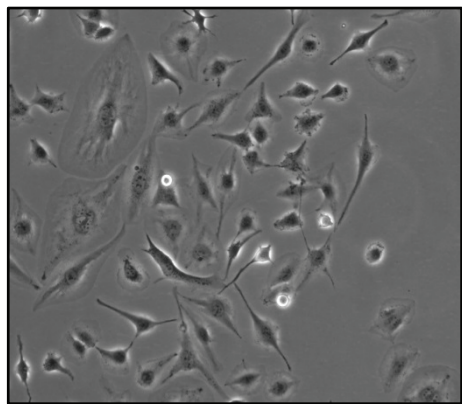

CTXR10

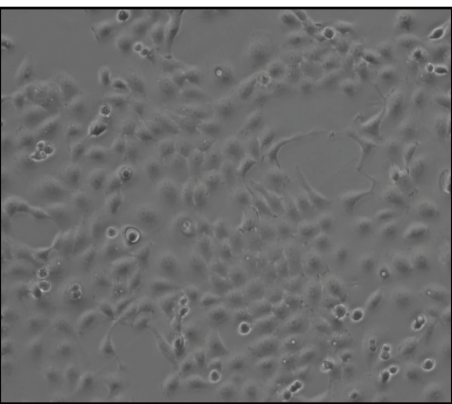

CTXR11

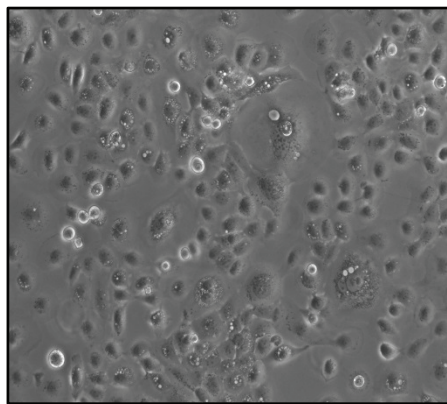

CTXR12

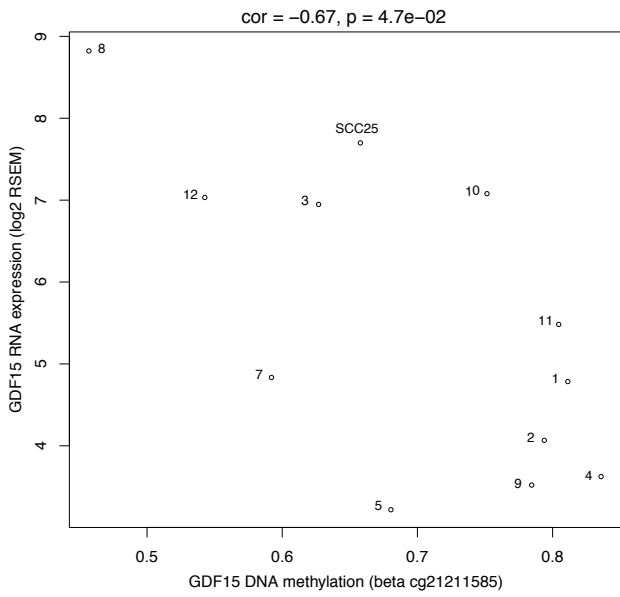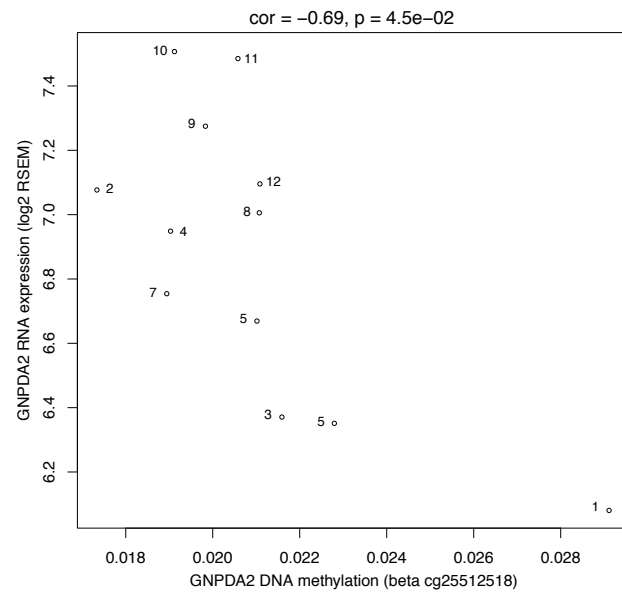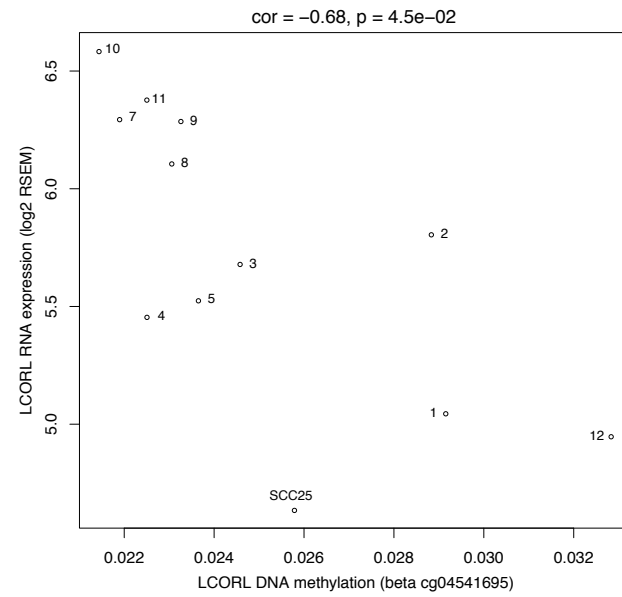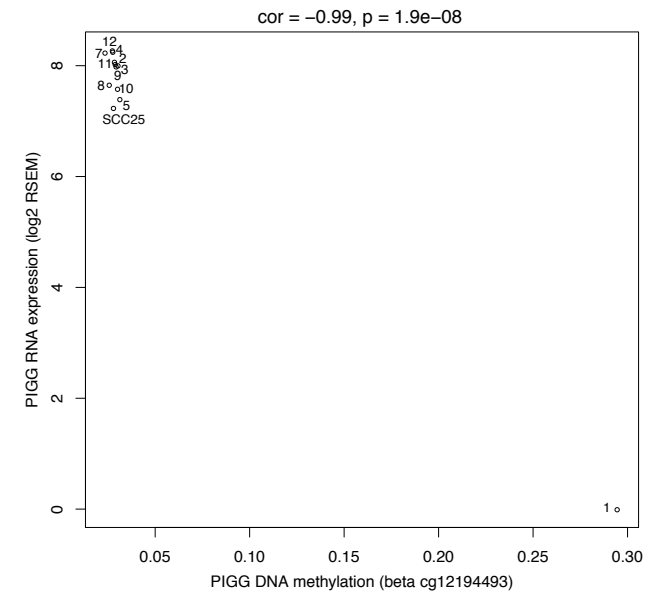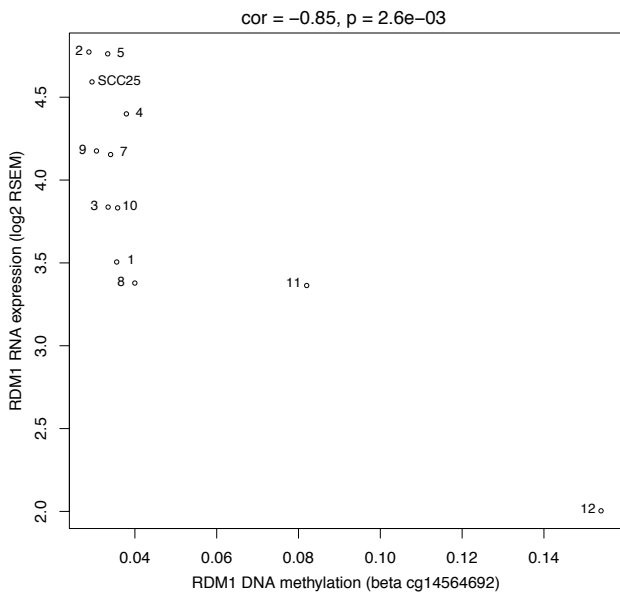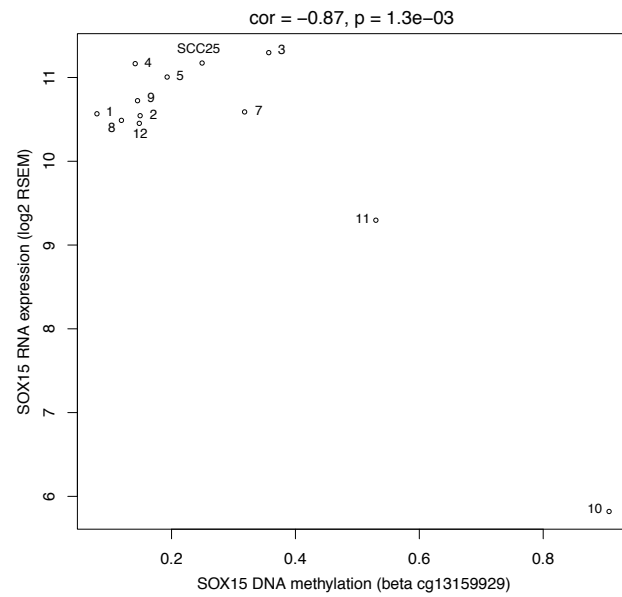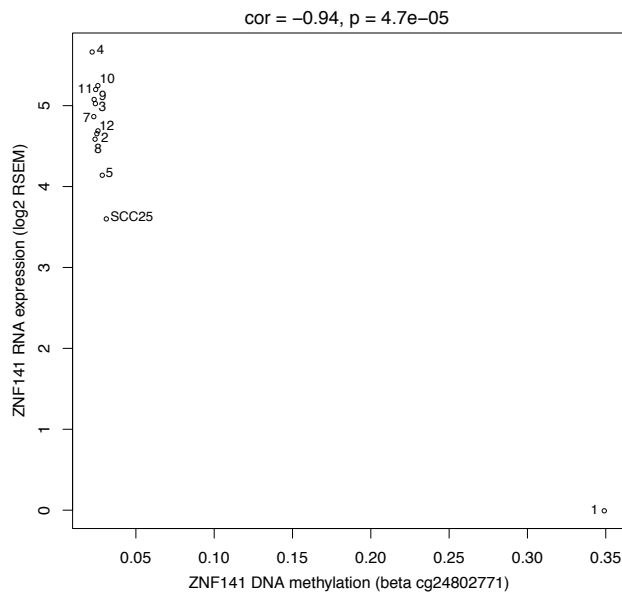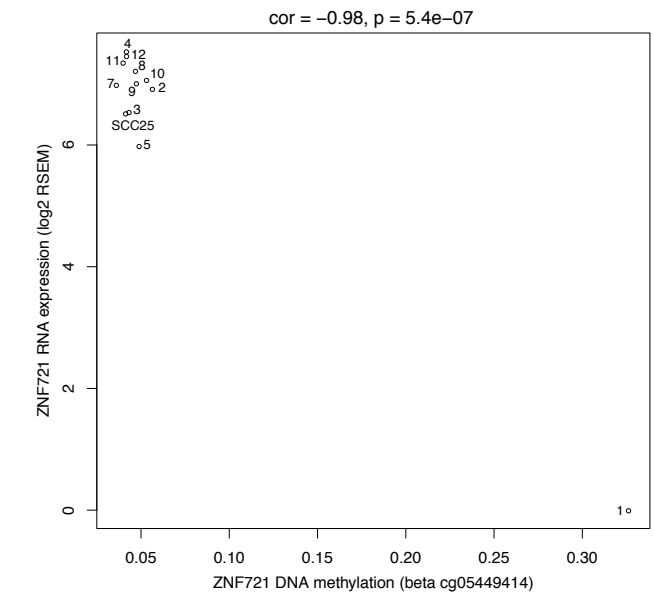

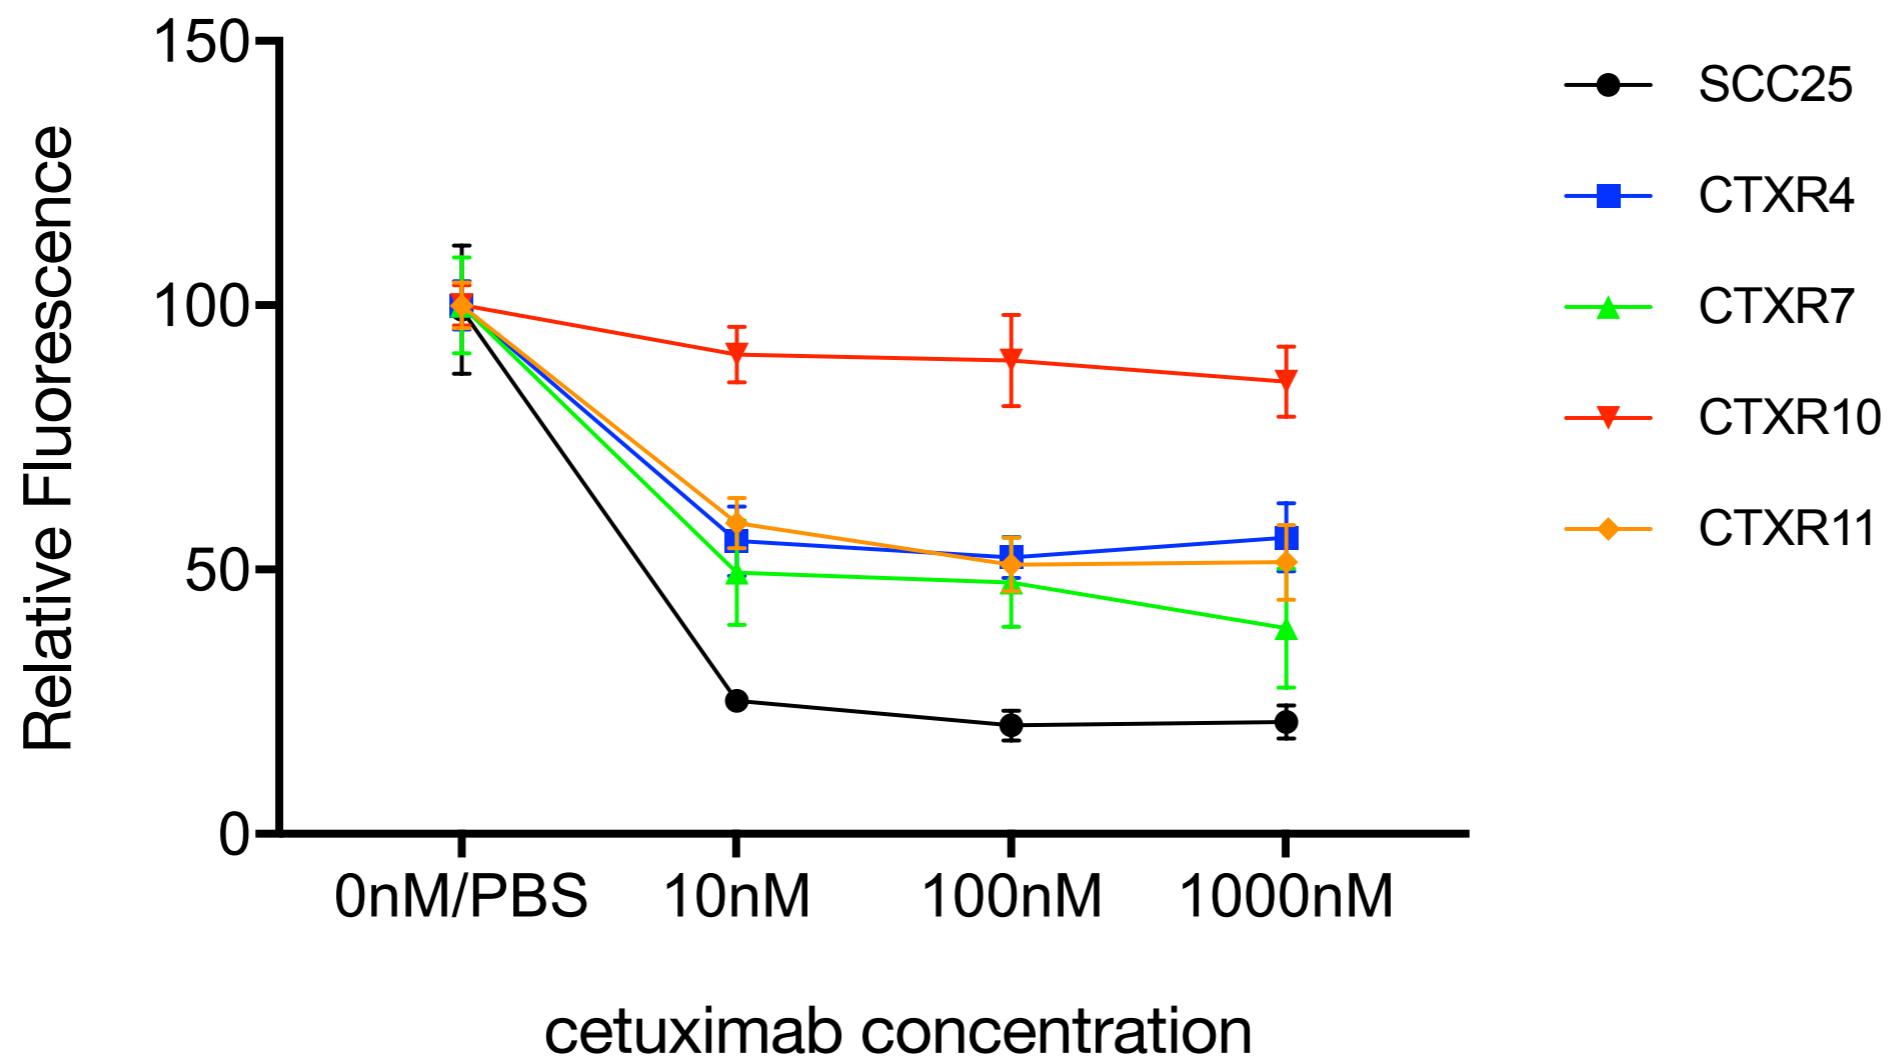

## Colony formation assay

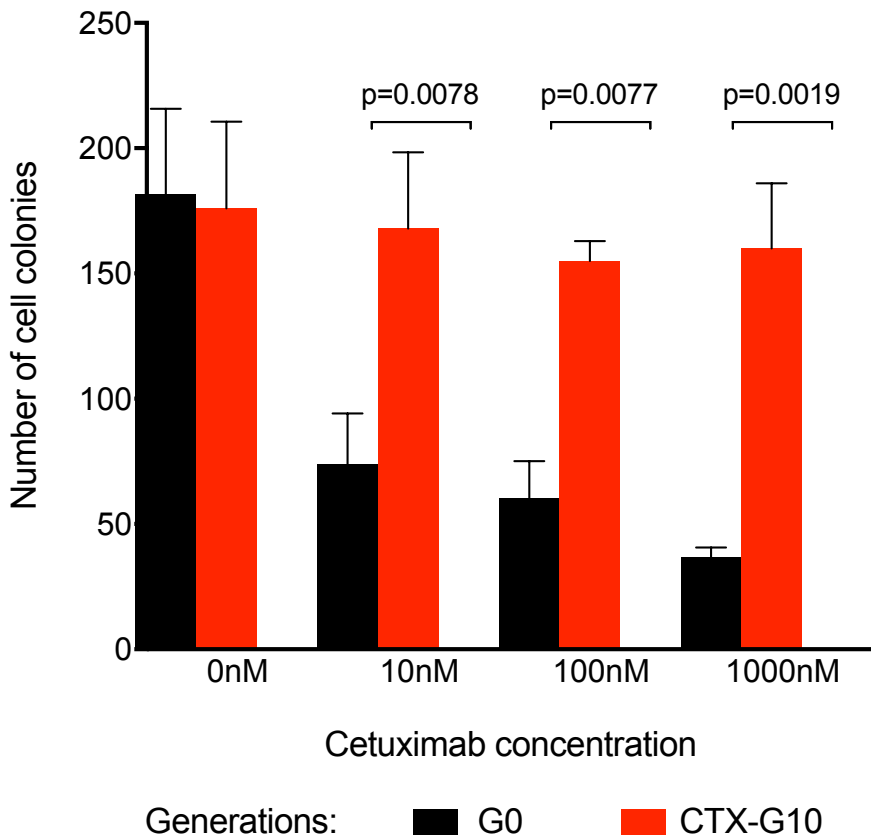

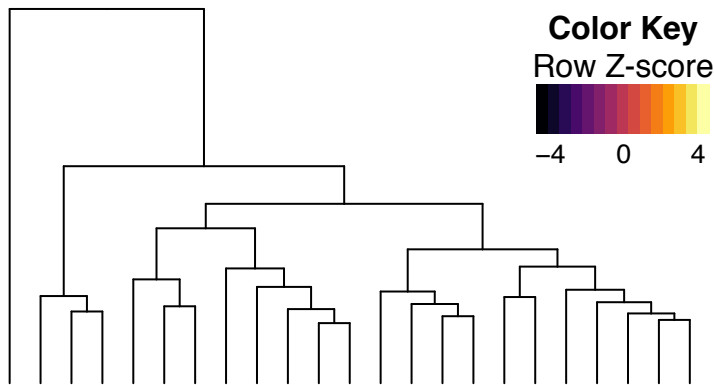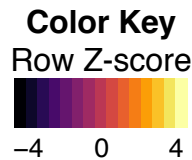

**Cetuximab** **PBS**

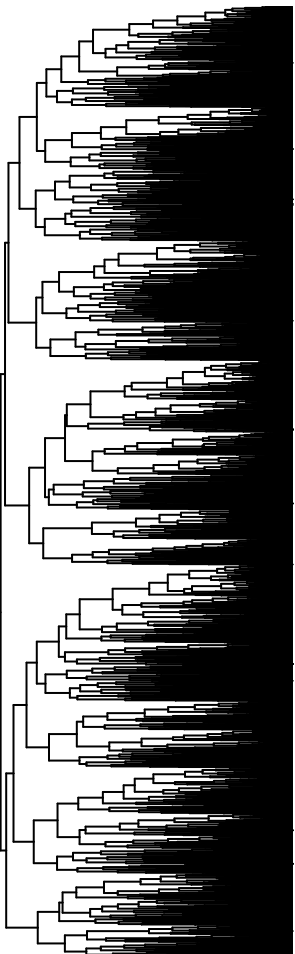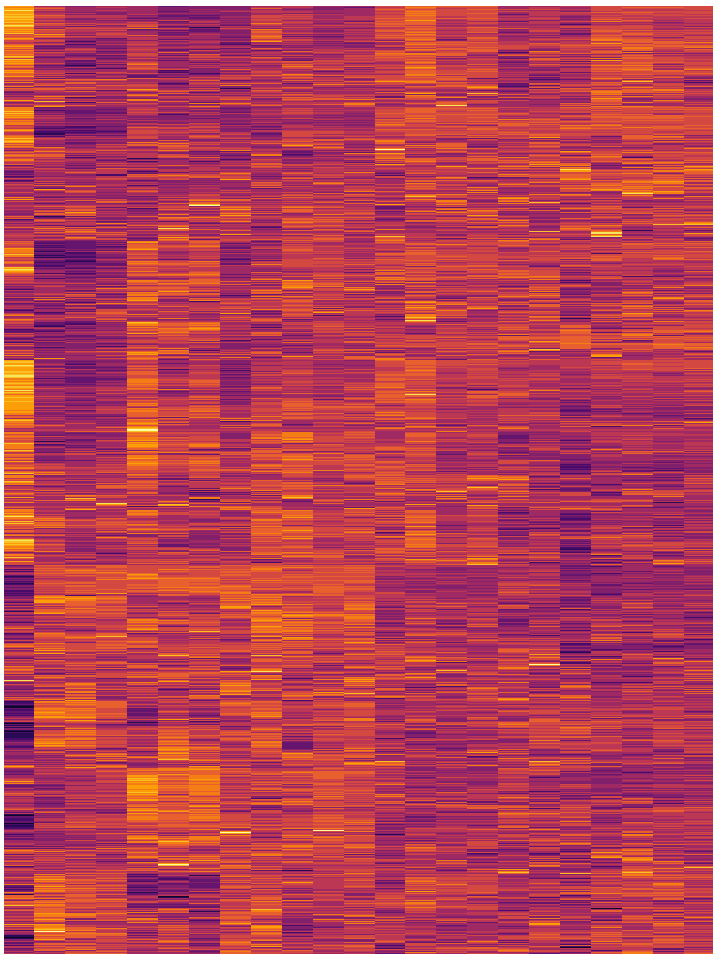

0 11 10 9 1 3 2 8 7 4 5 6 1 4 5 6 2 3 10 7 8 11 9

weeks

# Clustering of resistance signatures

A Unsupervised hierarchical clustering for resistance-associated genes

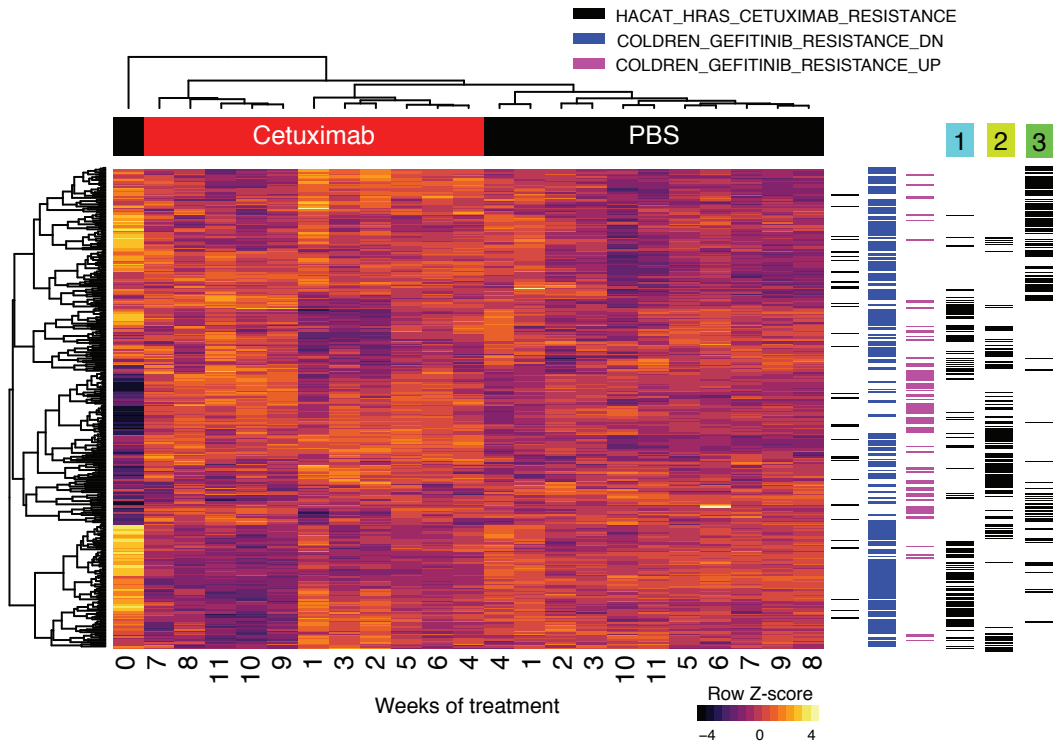

B Resistance signatures (avg expression v. time)  
HACAT\_RESISTANCE

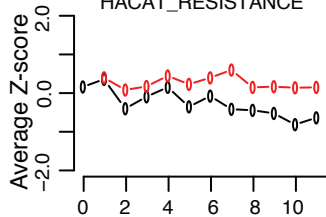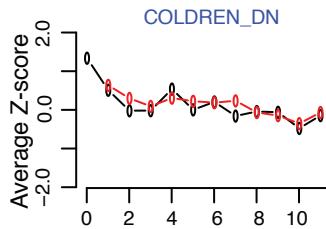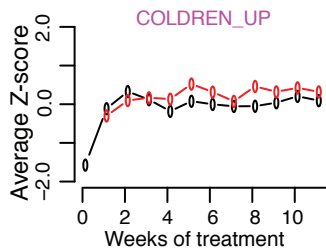

CoGAPS Metapathway Activity (Expression Patterns)

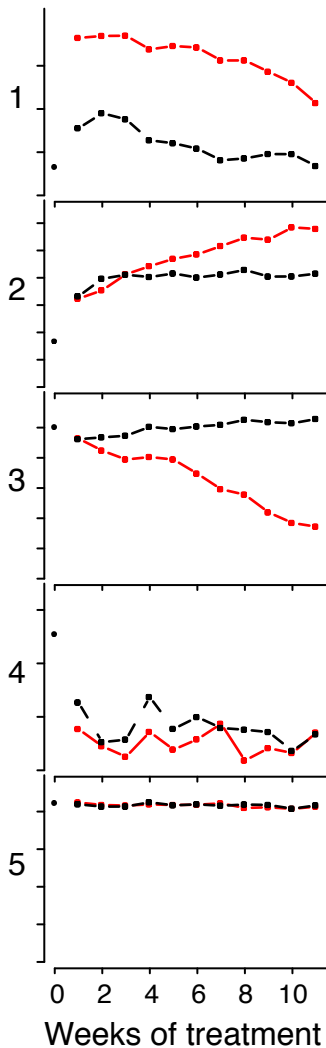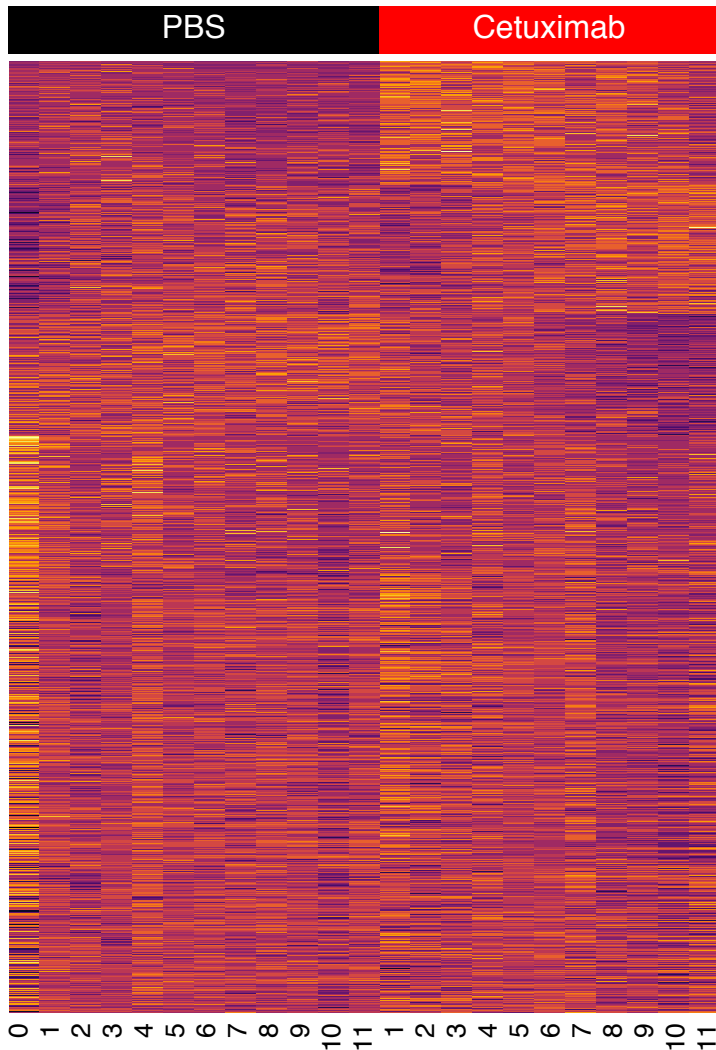

**Color Key**  
Row Z-score

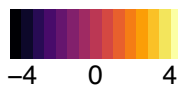



# Pattern geneset enrichment

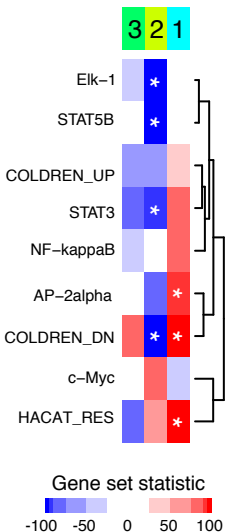

A Correlation in CoGAPS sample patterns

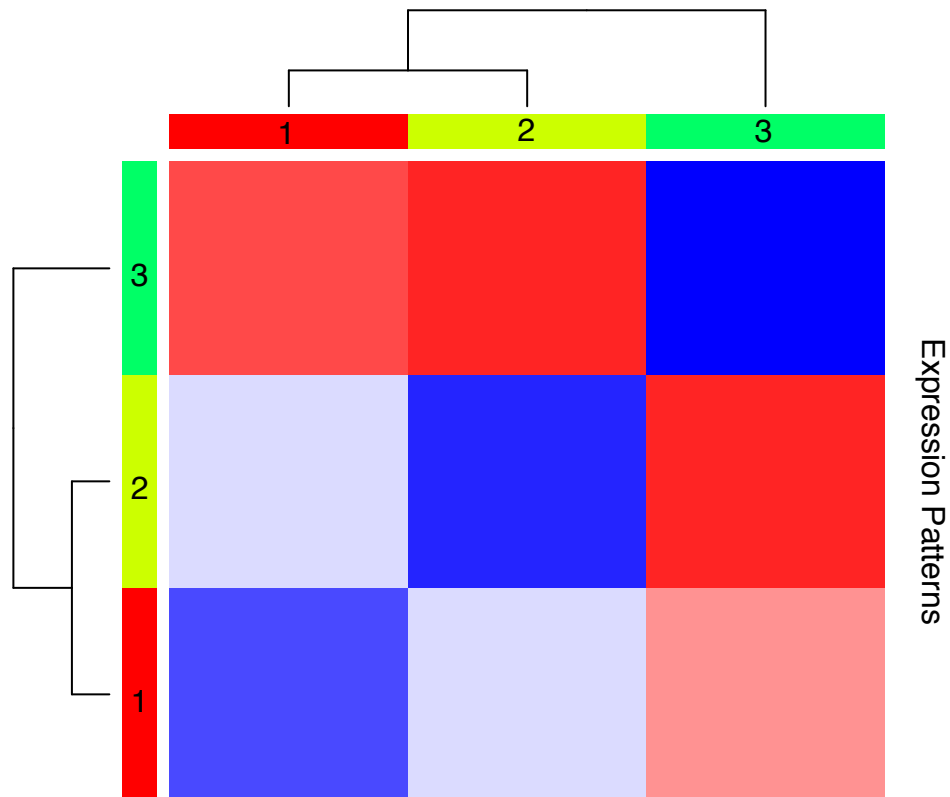

DNA Methylation Patterns

Pearson correlation coefficient (R)

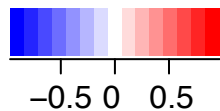

B Correlation in CoGAPS gene amplitudes

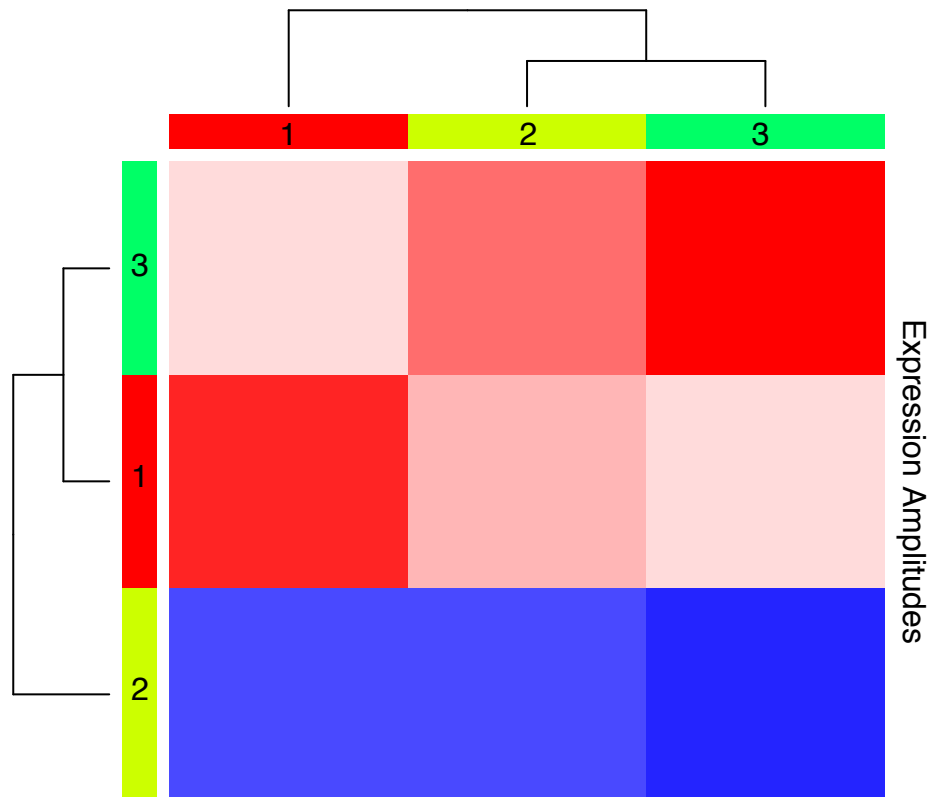

DNA Methylation Amplitudes

Pearson correlation coefficient (R)

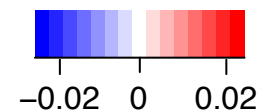

PBS

Cetuximab

CTX resistant clones

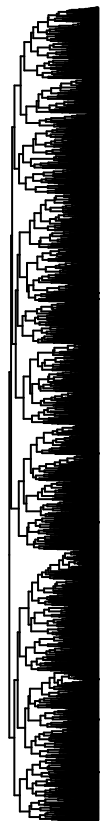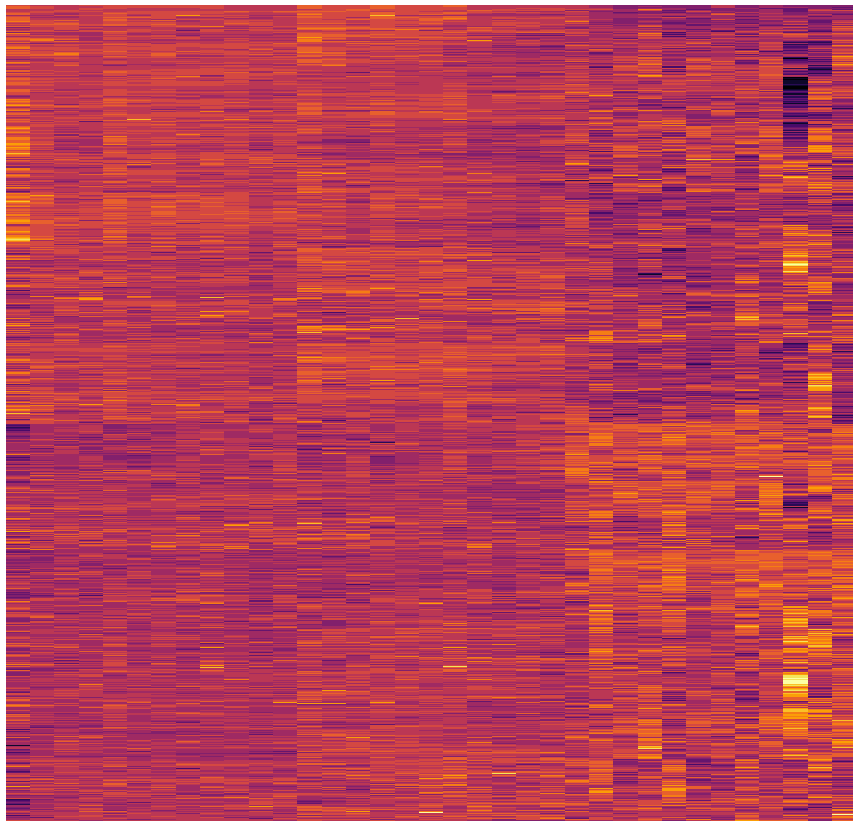

0 1 2 3 4 5 6 7 8 9 10 11 1 2 3 4 5 6 7 8 9 10 11  
SCC25  
CTXR1  
CTXR2  
CTXR3  
CTXR4  
CTXR5  
CTXR7  
CTXR8  
CTXR9  
CTXR10  
CTXR11  
CTXR12

Weeks of treatment

Clone ID

Row Z-score

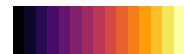

-4 0 4

PBS

Cetuximab

CTX resistant clones

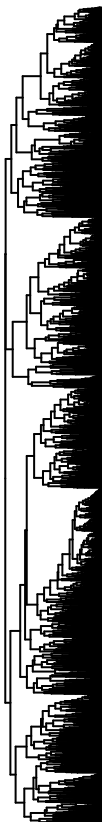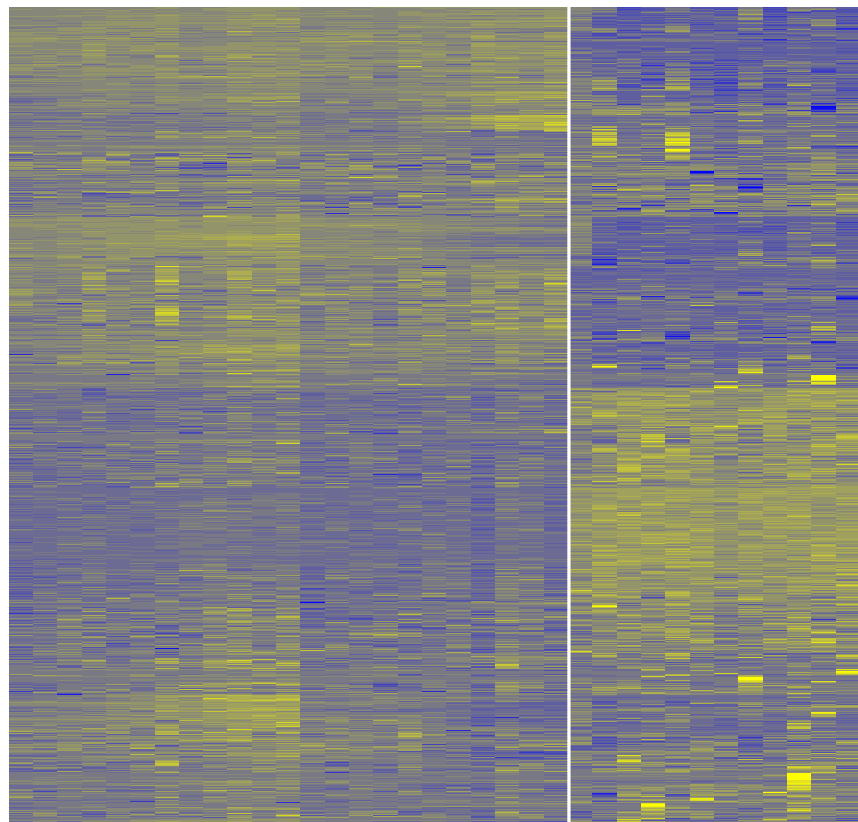

0 1 2 3 4 5 6 7 8 9 10 11 1 2 3 4 5 6 7 8 9 10 11

SCC25  
CTXR1  
CTXR2  
CTXR3  
CTXR4  
CTXR5  
CTXR7  
CTXR8  
CTXR9  
CTXR10  
CTXR11  
CTXR12

Weeks of treatment

Clone ID

Row Z-score ( $\beta$ )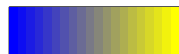

-4 0 4
